# Supplementary material for: Effectiveness of Adapted COVID-19 Vaccines and Ability to Establish Herd Immunity against Omicron BA.1 and BA4-5 Variants of SARS-CoV-2
Source: MDPI journal article supplement (doi:10.3390/vaccines11121836), 2023-12-10

Supplementary material

Supplementary Figure S1. Prisma flow diagram

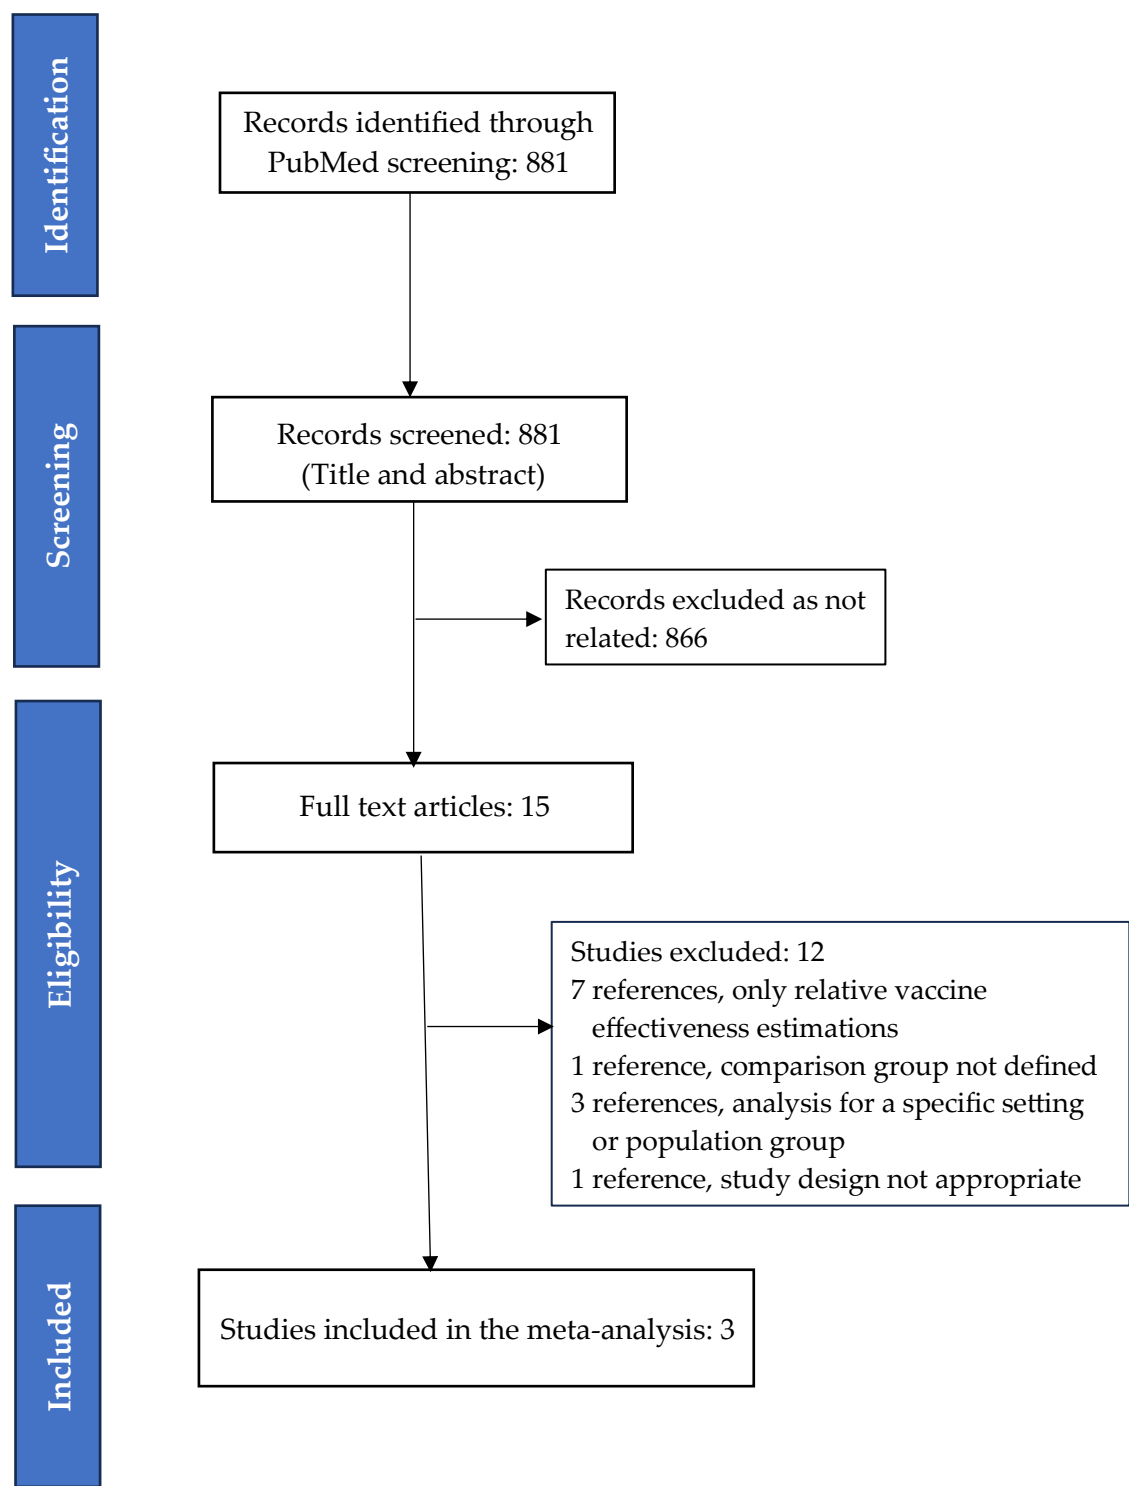

**Supplement Figure S2.** Vaccination coverage (%) required to establish herd immunity against SARS-CoV-2 with reproductive numbers ( $R_0$ ) from 6 to 12 by effectiveness (%) for adapted vaccines using face masks to reduce viral transmissibility by 15.1%. Objectives of vaccination coverage of 70%, 80% and 90% indicated by dashed red, blue and green lines, respectively

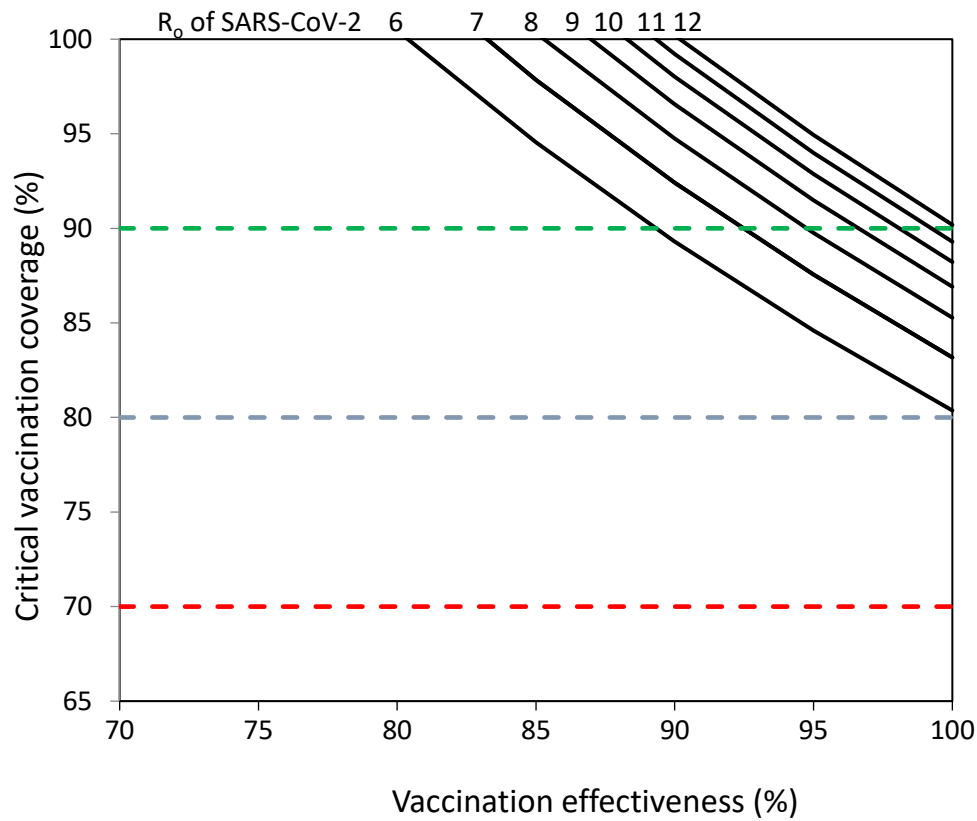

**Supplement Figure S3.** Vaccination coverage (%) required to establish herd immunity against SARS-CoV-2 with reproductive numbers ( $R_0$ ) from 6 to 12 by effectiveness (%) for adapted vaccines using face masks, social distancing and travel restrictions to reduce viral transmissibility by 54.3%. Objectives of vaccination coverage of 70%, 80% and 90% indicated by dashed red, blue and green lines, respectively

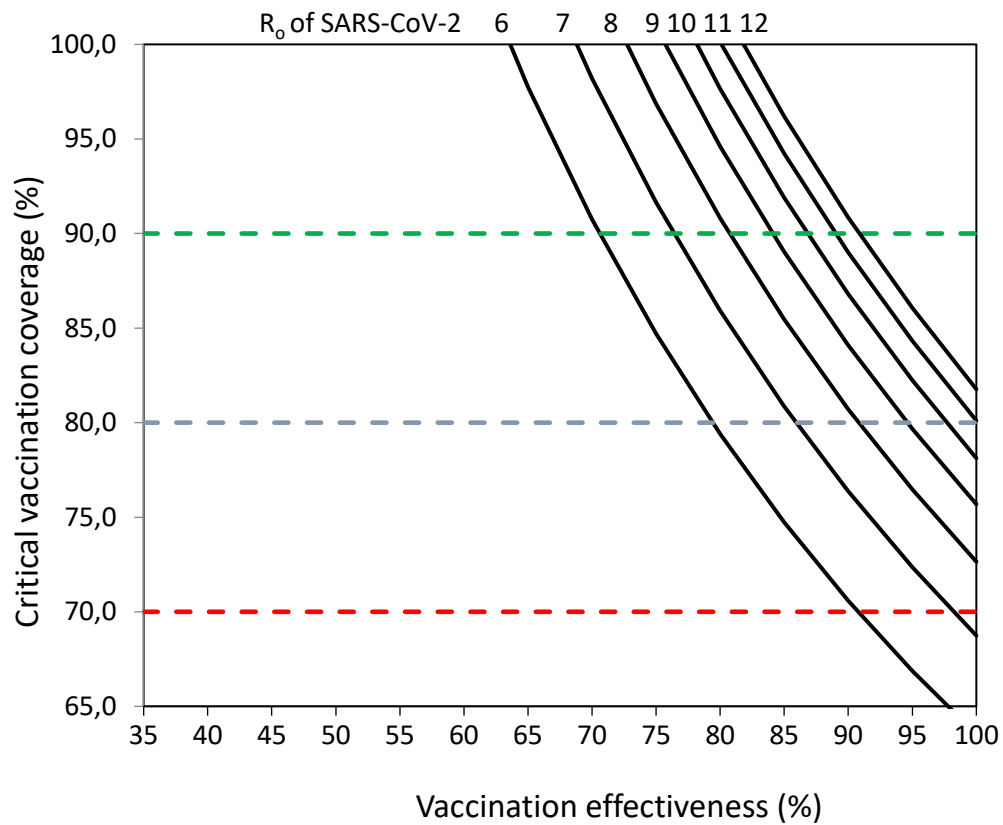

Figure 1 is a line graph titled "R<sub>0</sub> of SARS-CoV-2" showing the relationship between vaccination effectiveness and critical vaccination coverage for different R<sub>0</sub> values. The x-axis is "Vaccination effectiveness (%)" ranging from 70 to 100. The y-axis is "Critical vaccination coverage (%)" ranging from 65.0 to 100.0. A horizontal dashed green line is at 90.0% and a horizontal dashed red line is at 70.0%. Seven curves are plotted for R<sub>0</sub> values of 6, 7, 8, 9, 10, 11, and 12. The curves show that as R<sub>0</sub> increases, the required critical vaccination coverage also increases for any given effectiveness level.

| Vaccination effectiveness (%) | R <sub>0</sub> 6 | R <sub>0</sub> 7 | R <sub>0</sub> 8 | R <sub>0</sub> 9 | R <sub>0</sub> 10 | R <sub>0</sub> 11 | R <sub>0</sub> 12 |
|-------------------------------|------------------|------------------|------------------|------------------|-------------------|-------------------|-------------------|
| 70                            | 100.0            | 100.0            | 100.0            | 100.0            | 100.0             | 100.0             | 100.0             |
| 75                            | 100.0            | 100.0            | 100.0            | 100.0            | 100.0             | 100.0             | 100.0             |
| 80                            | 100.0            | 100.0            | 100.0            | 100.0            | 100.0             | 100.0             | 100.0             |
| 85                            | 100.0            | 100.0            | 98.0             | 99.0             | 100.0             | 100.0             | 100.0             |
| 90                            | 98.0             | 99.0             | 96.0             | 97.0             | 98.0              | 99.0              | 100.0             |
| 95                            | 94.0             | 96.0             | 92.0             | 94.0             | 96.0              | 97.0              | 98.0              |
| 100                           | 88.0             | 91.0             | 85.0             | 88.0             | 91.0              | 94.0              | 97.0              |

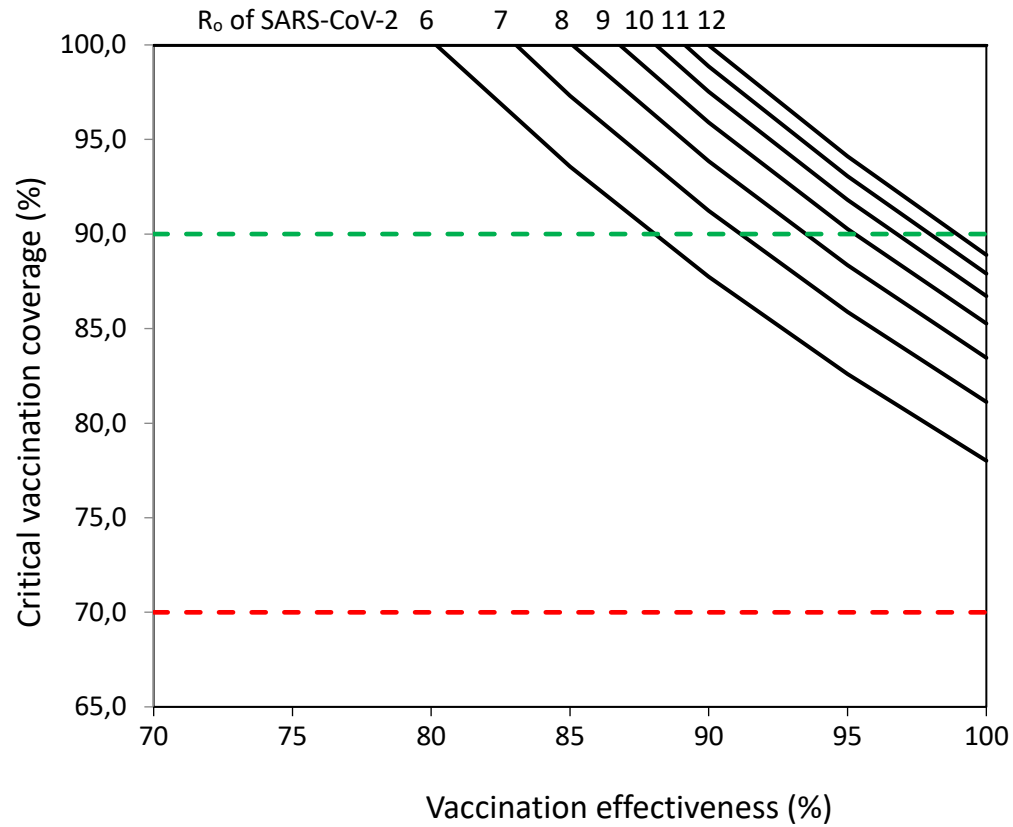

**Supplement Figure S5.** Vaccination coverage (%) required to establish herd immunity against SARS-CoV-2 with reproductive numbers ( $R_0$ ) from 6 to 12 by effectiveness (%) for adapted vaccines using face masks, social distancing and travel restrictions to reduce viral transmissibility by 54.3%. With 10% prevalence of protected individuals in the population. Objectives of vaccination coverage of 70%, 80% and 90% indicated by dashed red, blue and green lines, respectively

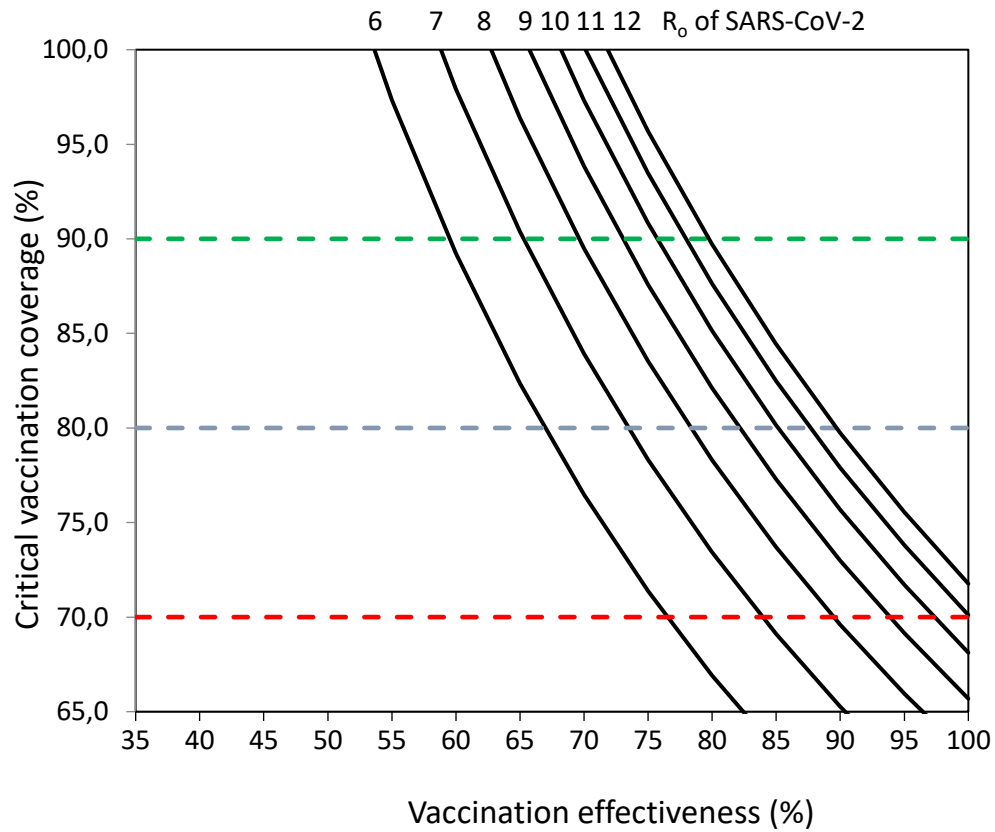

Supplement: s1 [file s1]
